# Supplementary material
Source: HighWire-hosted journal article supplement (https://thorax.bmj.com/content/thoraxjnl-2019-213968)
Supplement: inline-supplementary-material-1 [file inline-supplementary-material-1.pdf]

## Supplementary material

**Supplementary Table 1** : Characteristics and description of all physicians who participated in the study and differences based on physician gender

|                            | <b>Female MD</b> | <b>Male MD</b> | <b>All</b>              | <b>p-value</b> |
|----------------------------|------------------|----------------|-------------------------|----------------|
|                            | 137 (34%)        | 262 (66%)      | 404 (5 genders missing) |                |
| Academic practice          | 110 (80%)        | 176 (67)       | 288                     | 0.006          |
| Fellowship training        |                  |                |                         | 0.005          |
| In training                | 12 (9%)          | 5 (2%)         | 17                      |                |
| Yes                        | 117 (85%)        | 238 (90%)      | 359                     |                |
| No                         | 8 (6%)           | 19 (7%)        | 28                      |                |
| Years of experience        |                  |                |                         |                |
| Mean years (SD)            | 13.49 (9.14)     | 17.2 (10.47)   | 15.81 (14.8)            | 0.001          |
| 0-5                        | 36 (26%)         | 37 (14)        | 73                      | 0.015          |
| 6-10                       | 28 (20%)         | 57 (22%)       | 85                      |                |
| 11-15                      | 25 (18%)         | 40 (15%)       | 65                      |                |
| 16-20                      | 19 (14%)         | 42 (16%)       | 61                      |                |
| >20                        | 29 (21%)         | 86 (33%)       | 115                     |                |
| Continent of practice      |                  |                |                         | 0.019          |
| Africa                     | 3 (2%)           | 0              | 3                       |                |
| Americas                   | 41 (30%)         | 99 (38%)       | 140                     |                |
| Asia                       | 15 (11%)         | 38 (15%)       | 55                      |                |
| Europe                     | 67 (49%)         | 110 (42%)      | 177                     |                |
| Middle East                | 2 (1%)           | 8 (3%)         | 10                      |                |
| Oceania                    | 9 (7%)           | 7 (3%)         | 16                      |                |
| Access to ILD specific MDT | 82 (60%)         | 135 (52%)      | 217                     | 0.28           |

Supplementary Table 2. Unadjusted logistic regression for the odds of a leading diagnosis of IPF (vs non-IPF)

|                               | <b>Odds ratio for a diagnosis of IPF</b> | <b>95% CI</b>  | <b>p-value</b> |
|-------------------------------|------------------------------------------|----------------|----------------|
| Patient male gender           | 5.13                                     | 4.78 to 5.51   | 0.000          |
| Age (per year increase)       | 1.06                                     | 1.059 to 1.063 | 0.000          |
| Presence of any autoantibody  | 0.79                                     | 0.75 to 0.84   | 0.000          |
| FVC (per 10% point decrease)  | 1.00                                     | 0.99 to 1.01   | 0.87           |
| DLCO (per 10% point decrease) | 1.43                                     | 1.40 to 1.46   | 0.000          |
| Ever smoker                   | 3.64                                     | 3.39 to 3.89   | 0.000          |
| Environmental exposure (any)  | 0.91                                     | 0.84 to 0.98   | 0.015          |
| Serum precipitins (any)       | 0.83                                     | 0.78 to 0.89   | <0.001         |
| Physician male gender         | 1.02                                     | 0.97 to 1.09   | 0.36           |

Supplementary Table 3. Differences in mean diagnostic confidence for IPF based on patient gender and UIP pattern on CT

|                    | <b>Pattern on CT</b>     | <b>Diagnostic confidence<br/>Female patients<br/>Mean (SD)</b> | <b>Diagnostic<br/>confidence Male<br/>patients<br/>Mean (SD)</b> | <b>p-value</b> |
|--------------------|--------------------------|----------------------------------------------------------------|------------------------------------------------------------------|----------------|
| 2011<br>guidelines | Definite UIP             | 76.8% (74.9 to 78.7)                                           | 81.7% (80.9 to 82.5)                                             | <0.0001        |
|                    | Possible UIP             | 68.9% (67.2 to 70.5)                                           | 77.8% (77 to 78.5)                                               | <0.0001        |
|                    | Inconsistent with<br>UIP | 66.4% (63.2 to 69.6)                                           | 72.7% (71.4 to 74.1)                                             | 0.0001         |
| 2018<br>guidelines | UIP                      | 76.8% (74.9 to 78.7)                                           | 81.7% (80.1 to 82.5)                                             | <0.0001        |
|                    | Probable UIP             | 69.9% (68.2 to 71.5)                                           | 77.8% (77.0 to 78.5)                                             | <0.0001        |
|                    | Indeterminate            | 63% (58.1 to 67.9)                                             | 70.3% (68.6 to 71.9)                                             | 0.005          |
|                    | Alternate diagnosis      | 65.4% (61.9 to 68.9)                                           | 78.3% (75.8 to 80.8)                                             | <0.0001        |

Supplementary Table 4. Level of diagnostic confidence for first diagnosis of each case-score based on scoring physician gender

| <b>Diagnosis</b> | <b>All</b>    | <b>Female physicians</b> | <b>Male physicians</b> | <b>p-value</b> |
|------------------|---------------|--------------------------|------------------------|----------------|
| Overall          | 72.22 (20.91) | 71.98 (20.83)            | 72.35 (20.95)          | 0.19           |
| IPF              | 77.32         | 76.72 (19.17)            | 77.63 (19.03)          | 0.08           |
| CTD              | 70.63 (20.41) | 70.44 (20.0)             | 70.73 (20.65)          | 0.68           |
| cHP              | 66.73 (20.0)  | 67.12 (19.84)            | 65.97 (20.28)          | 0.15           |
| Unclassifiable   | 69.2 (21.95)  | 71.69 (22.57)            | 68.04 (21.58)          | 0.02           |

Supplementary Figure. Mean diagnostic confidence for a receiving a diagnosis of IPF based on patient sex and pattern of disease on CT

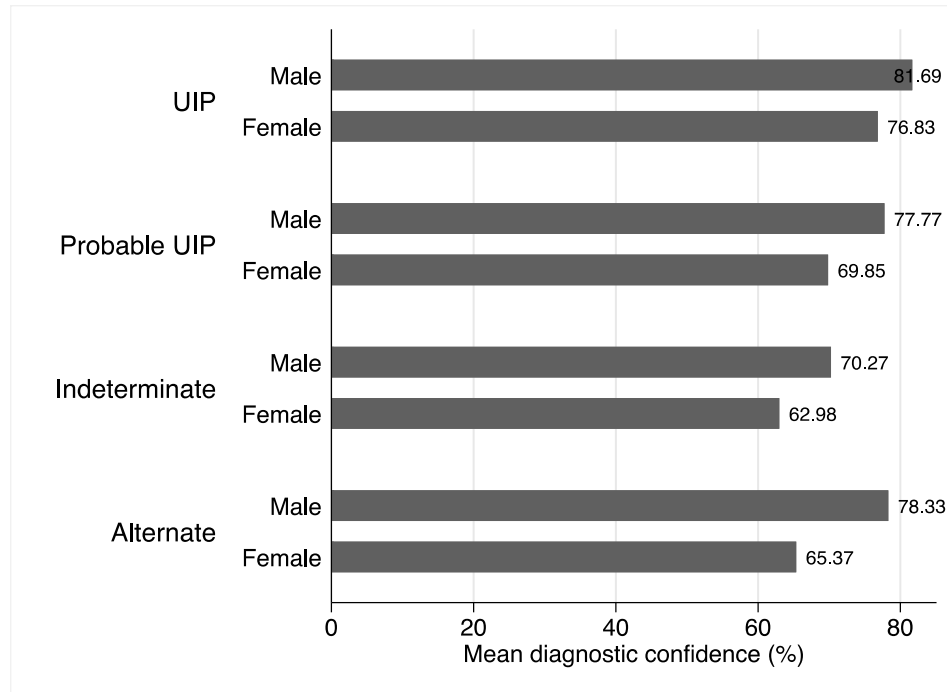

Caption: The diagnosis of IPF is made with significantly greater confidence for patients who are male compared to female, across all CT patterns for UIP (usual interstitial pneumonia).
